# Supplementary material for: Oropharyngeal resistome remains stable during COVID-19 therapy, while fecal resistome shifts toward a less diverse resistotype
Source: PubMed Central journal article supplement (PMC11617248; doi:10.1016/j.isci.2024.111319), 2024-11-05
Supplement: mmc1.pdf [file mmc1.pdf]

## **Supplemental information**

### **Oropharyngeal resistome remains stable during COVID-19 therapy, while fecal resistome shifts toward a less diverse resistotype**

**Elizaveta V. Starikova, Yulia S. Galeeva, Dmitry E. Fedorov, Elena V. Korneenko, Anna S. Speranskaya, Oksana V. Selezneva, Polina Y. Zoruk, Ksenia M. Klimina, Vladimir A. Veselovsky, Maxim D. Morozov, Daria I. Boldyreva, Evgenii I. Olekhnovich, Alexander I. Manolov, Alexander V. Pavlenko, Ivan E. Kozlov, Oleg O. Yanushevich, Natella I. Krikheli, Oleg V. Levchenko, Dmitry N. Andreev, Filipp S. Sokolov, Aleksey K. Fomenko, Mikhail K. Devkota, Nikolai G. Andreev, Andrey V. Zaborovsky, Sergei V. Tsaregorodtsev, Vladimir V. Evdokimov, Petr A. Bely, Igor V. Maev, Vadim M. Govorun, and Elena N. Ilina**

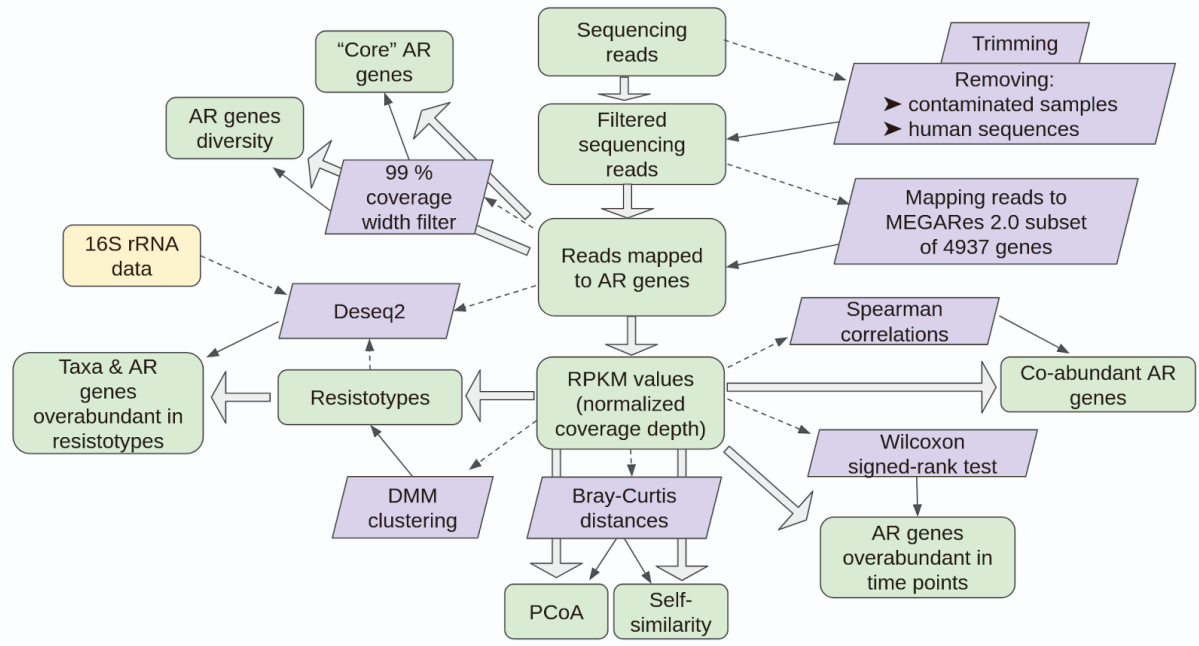

**Figure S1.** AR gene sequencing panel bioinformatics analysis scheme. **Related to STAR methods section**

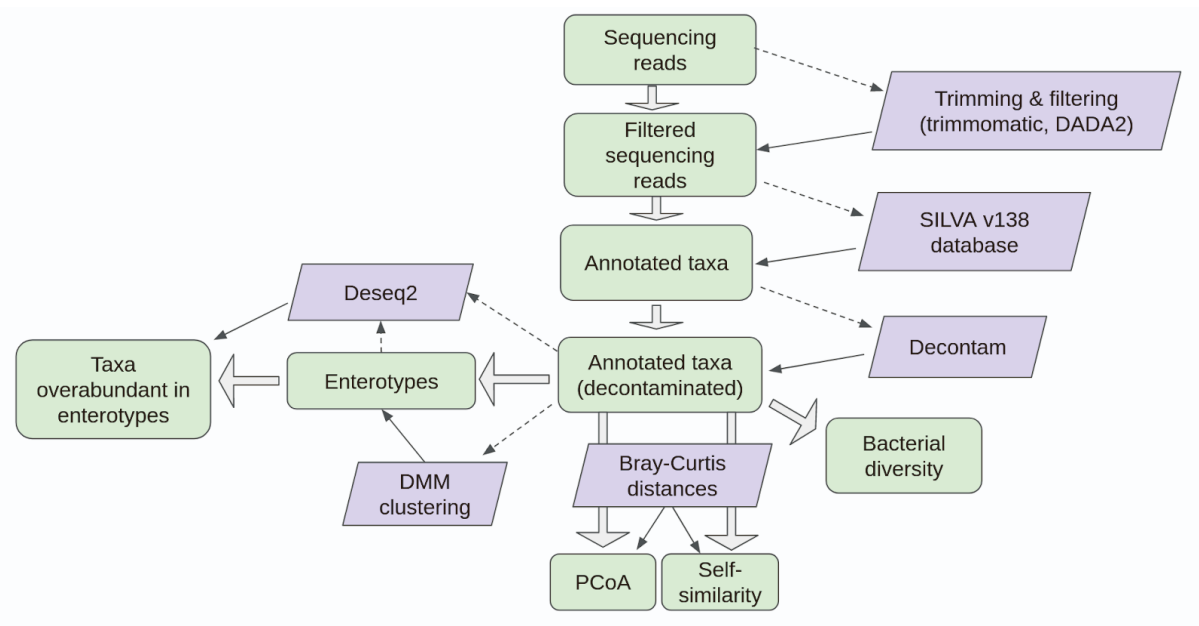

**Figure S2.** 16S rRNA gene amplicon sequencing data bioinformatics analysis scheme. **Related to STAR methods section**

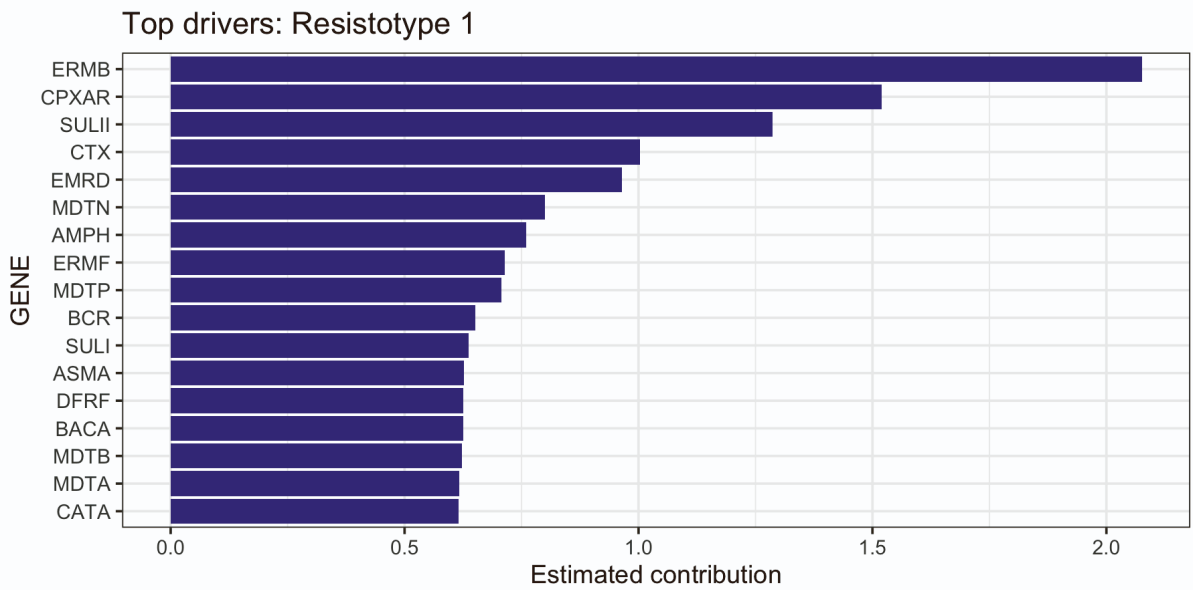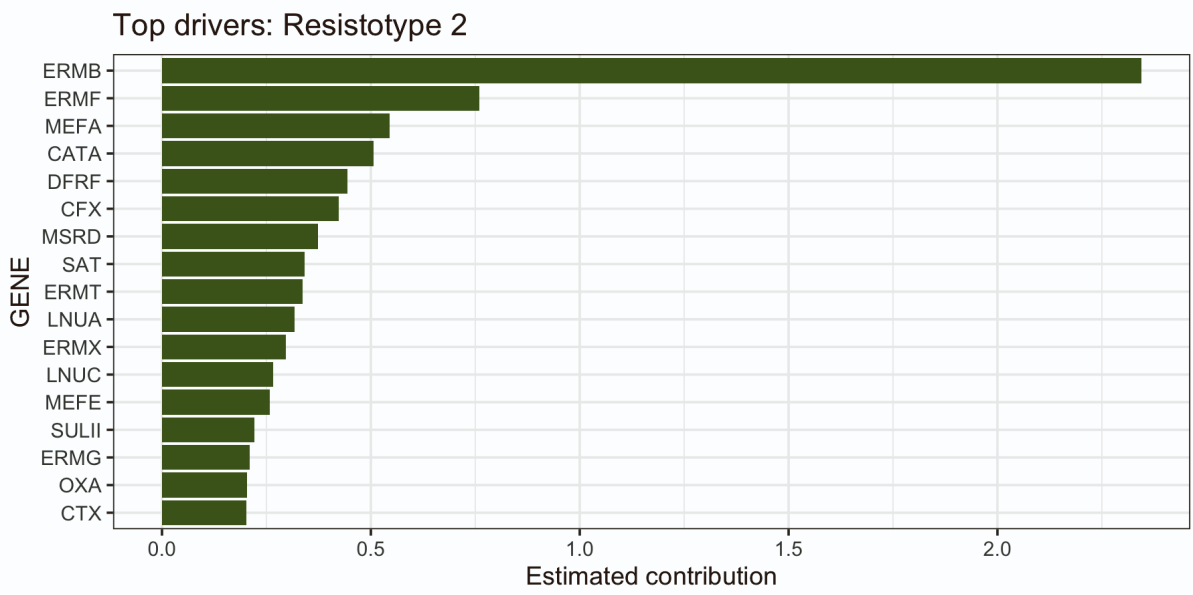

**Figure S3.** Top AR gene drivers contributing to resistotypes 1 and 2. **Related to Figure 6**

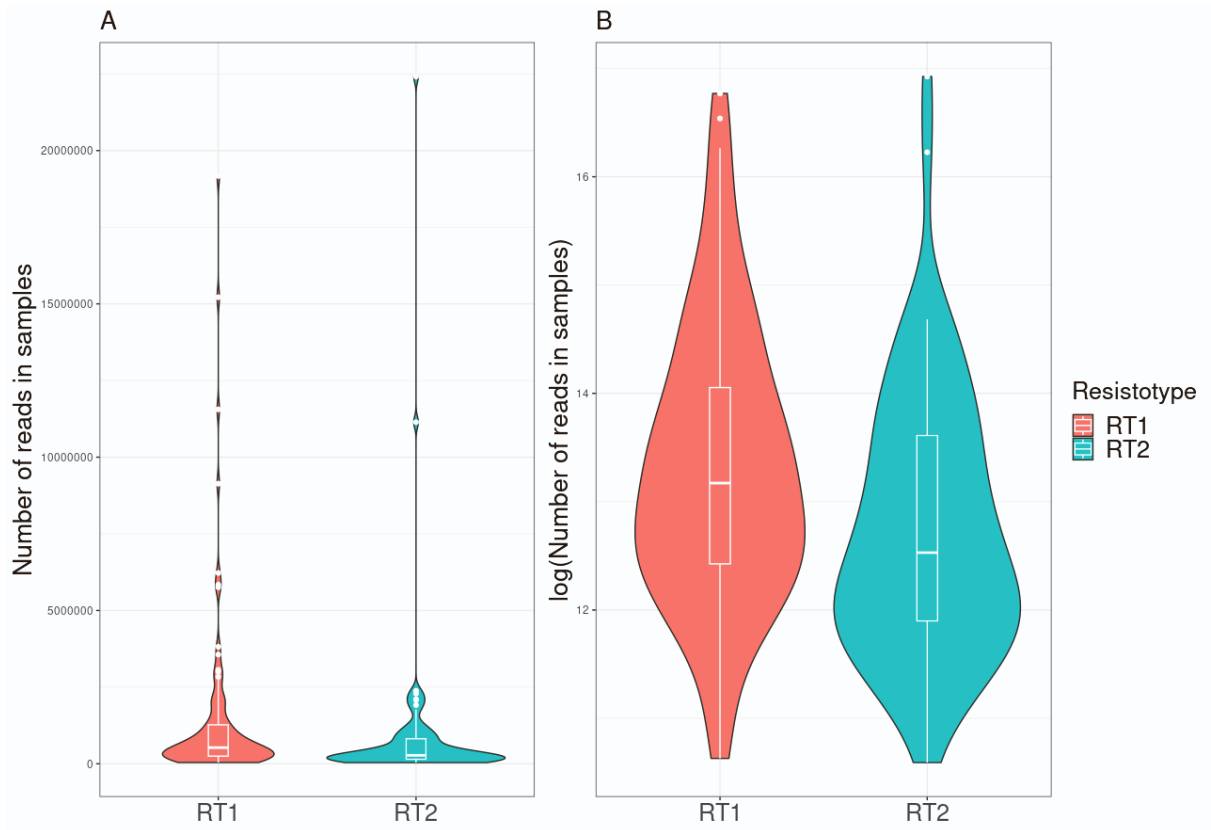

**Figure S4.** Boxplots/violin plots illustrating distribution of numbers of sequencing reads in the samples (grouped by assigned resistotypes). (A) Raw counts of sequencing reads (B) Log-transformed counts of sequencing reads. **Related to Figure 9**

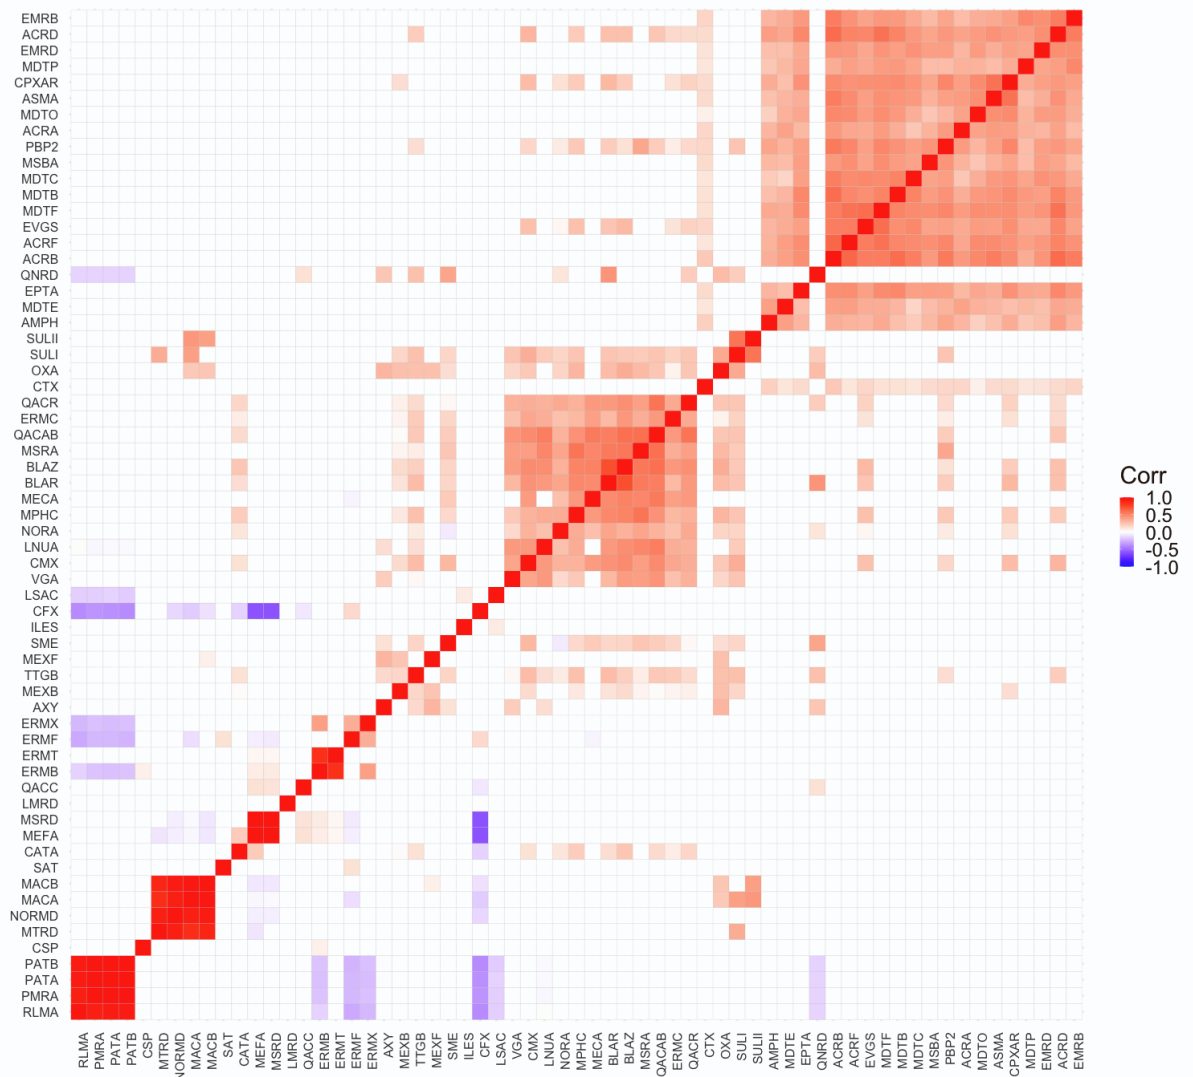

**Figure S5.** Heatmap representing correlation matrix of AR genes identified in oropharyngeal samples. Insignificant correlations ( $p < 0.05$ ) are blanked out. Red and blue colors indicate positive and negative Spearman correlations, correspondingly. **Related to Figure 13**

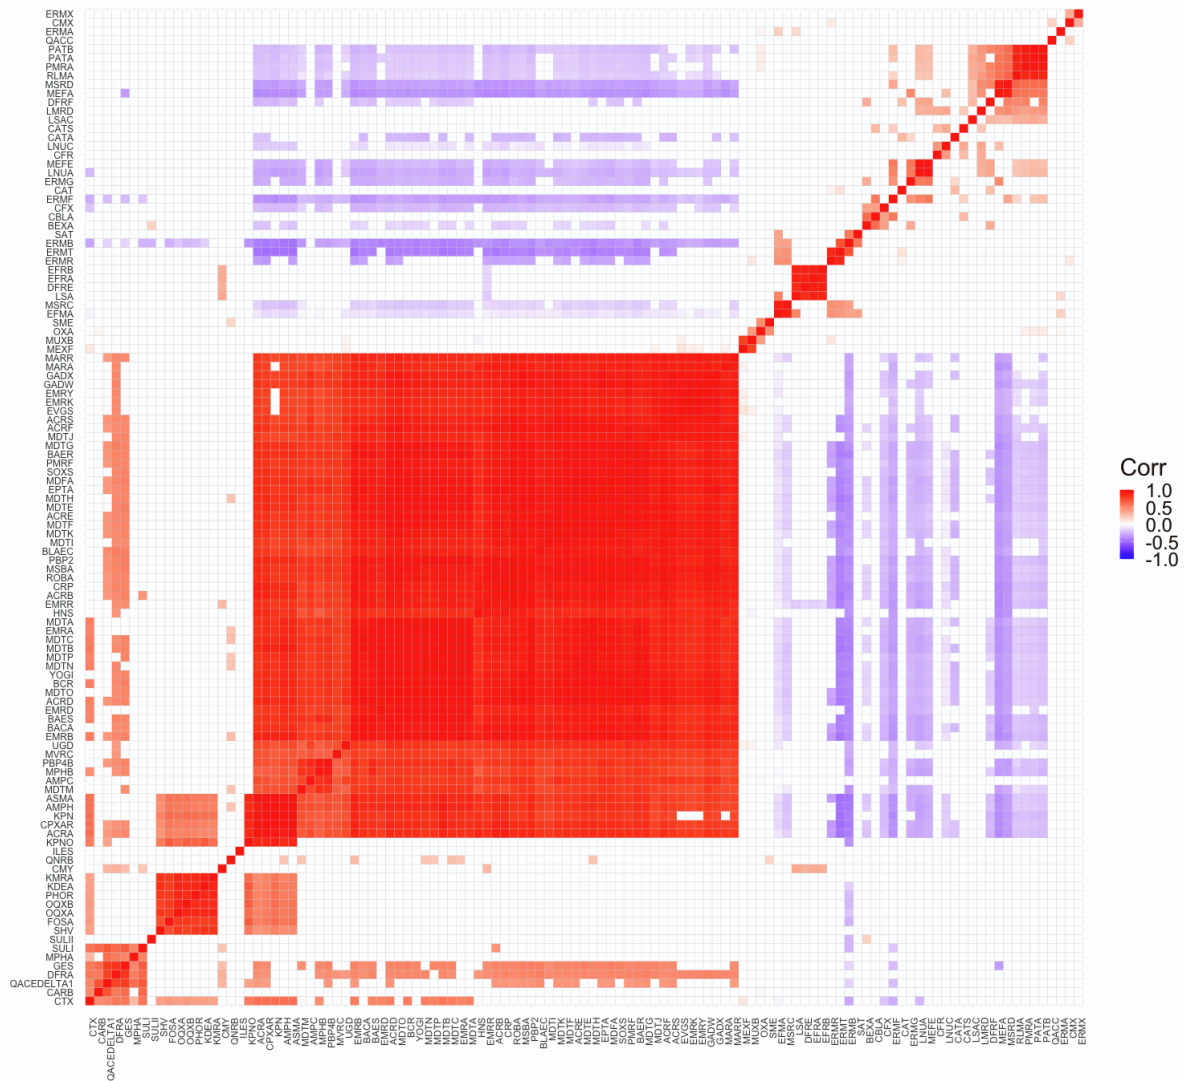

**Figure S6.** Heatmap representing correlation matrix of AR genes identified in fecal samples. Insignificant correlations ( $p < 0.05$ ) are blanked out. Red and blue colors indicate positive and negative Spearman correlations, correspondingly. **Related to Figure 14**

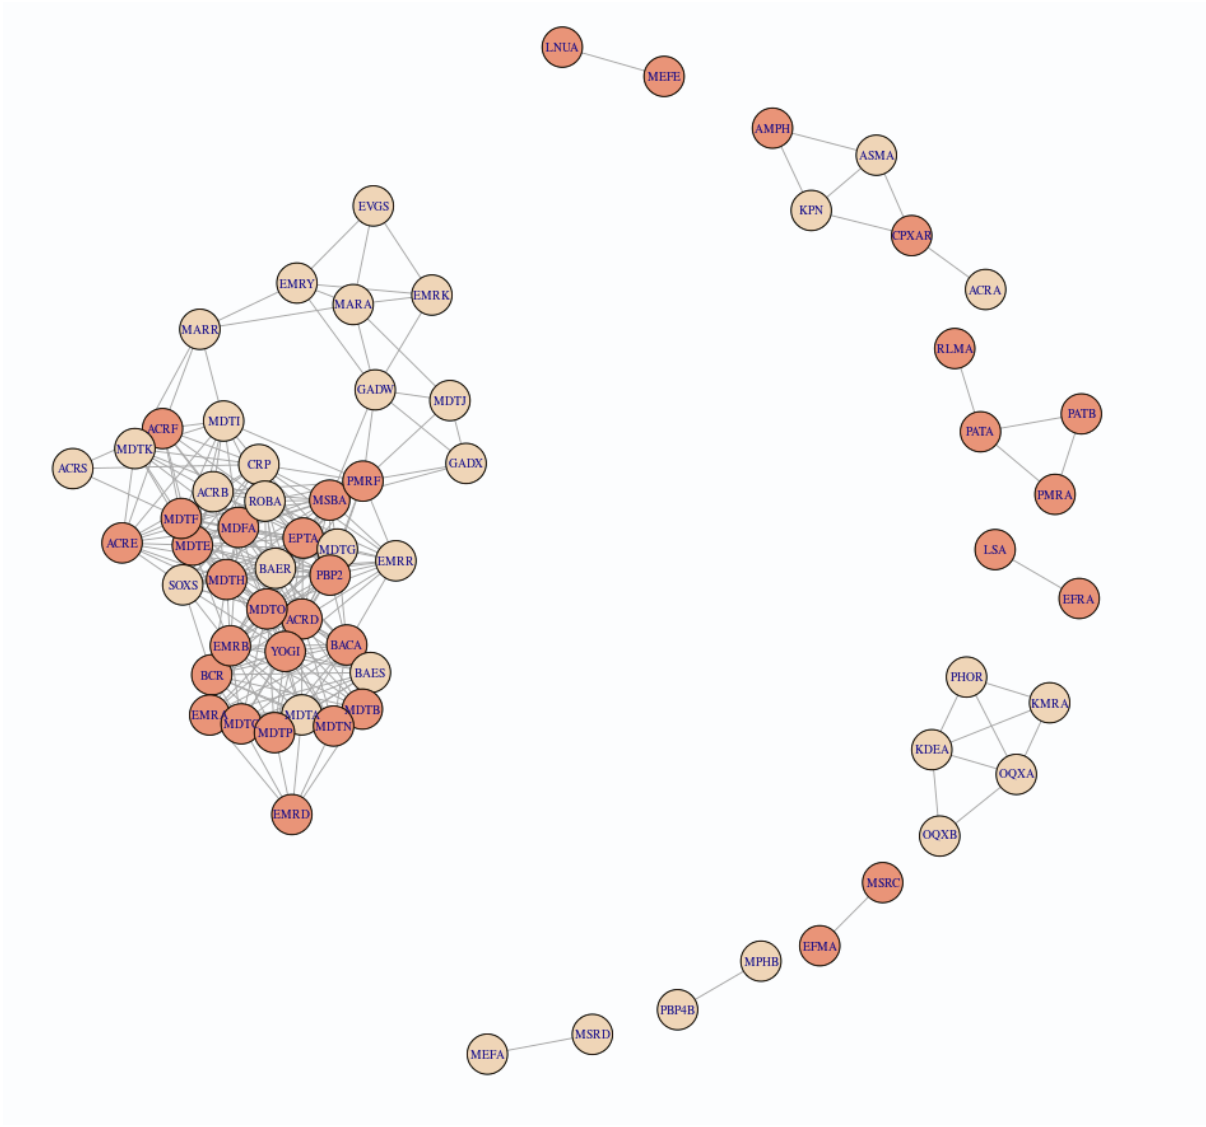

**Figure S7.** Gene clusters showing high (>0.9) correlation coefficients based of RPKM values in fecal samples of Resistotype 1 (RT1). Pink color represents vertices that are also found in co-abundant gene clusters of fecal resistotype 2 (RT2). **Related to Figure 14**

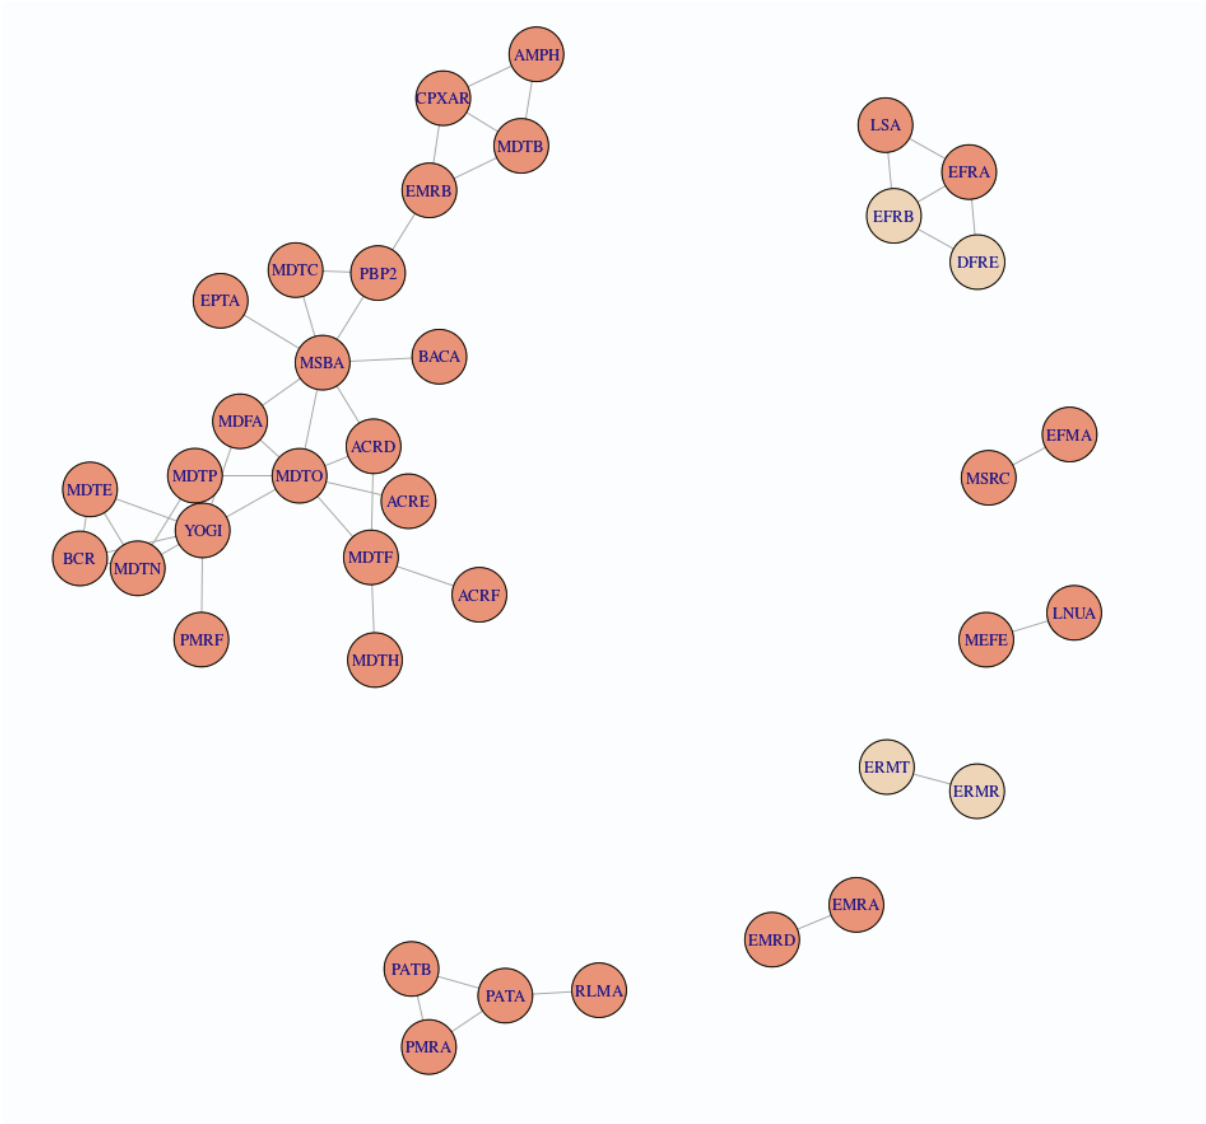

**Figure S8.** Gene clusters showing high (>0.9) correlation coefficients based of RPKM values in fecal samples of Resistotype 2 (RT2). Correlation was estimated as Spearman's rank correlation coefficient. Pink color represents vertices that are also found in co-abundant gene clusters of fecal resistotype 1 (RT1). **Related to Figure 14**



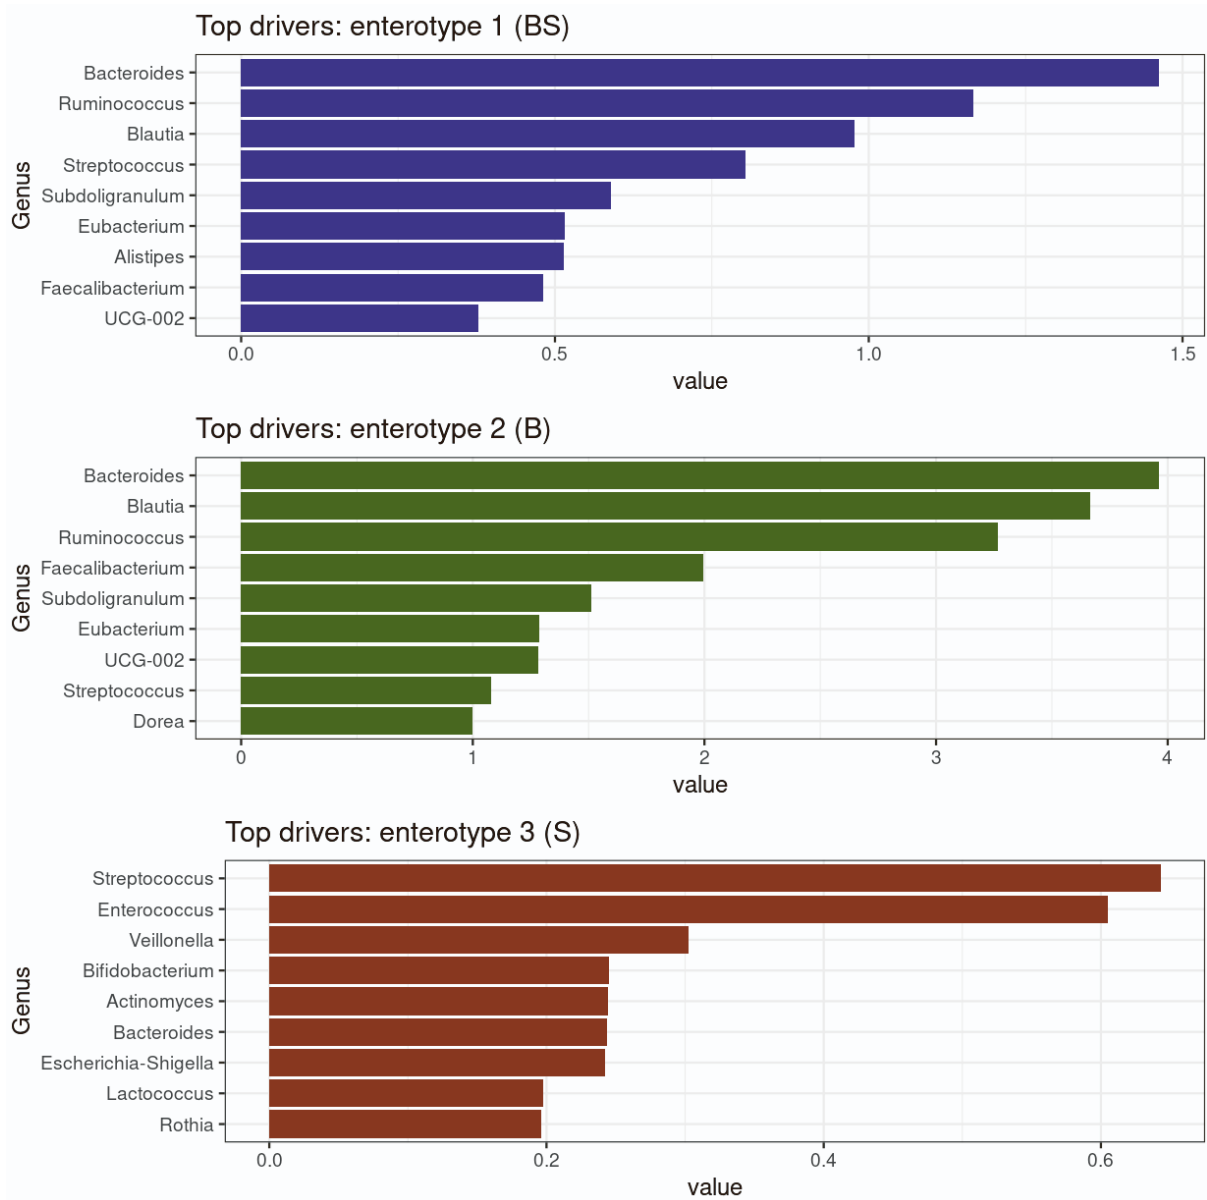

**Figure S9.** Barplots illustrating top drivers contributing to the three identified enterotypes. **Related to Figure 17**

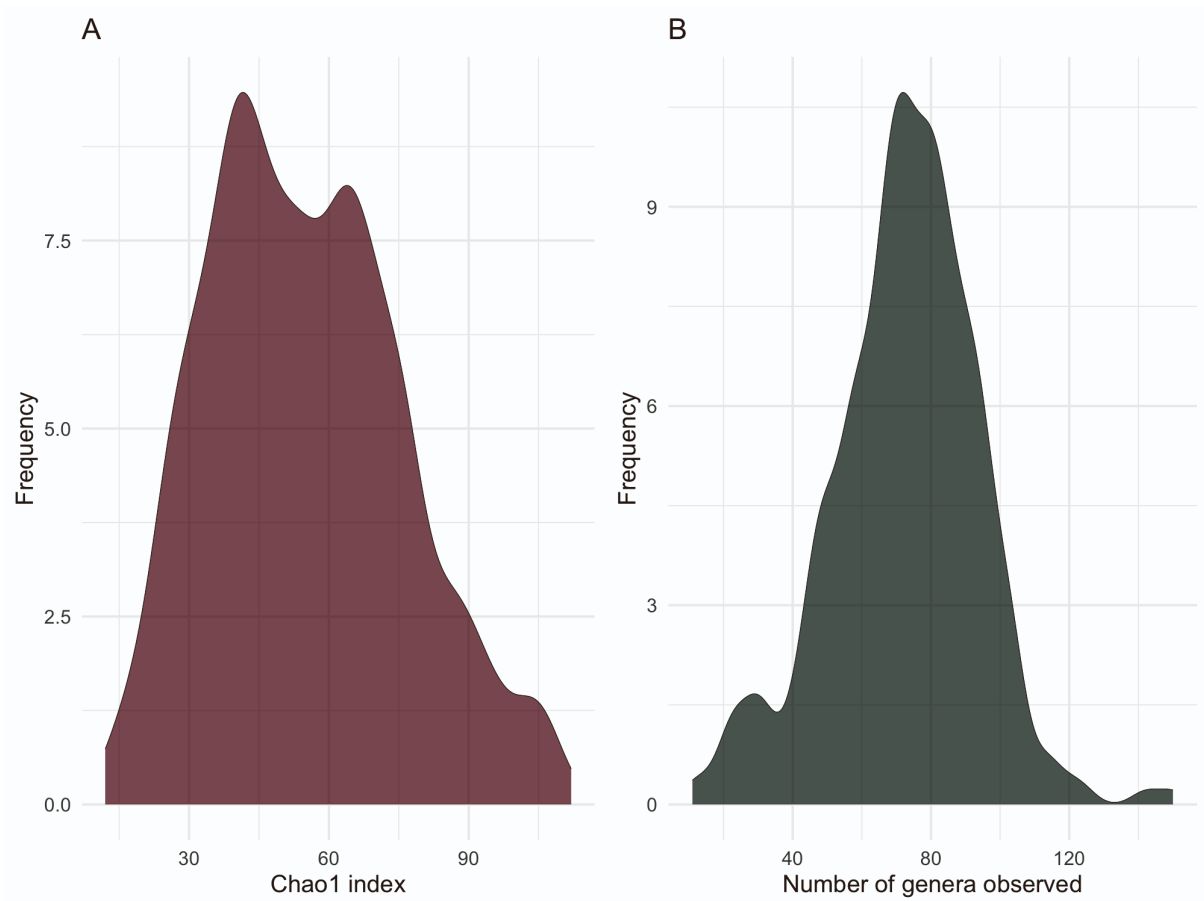

**Figure S10.** Bacterial diversity indices calculated for the oropharyngeal samples. (A) Species level, Chao1 index. Median 54, sd 20.99. (B) Genus level, the number of the observed genera. Median 73, sd 21.3. **Related to Figure 19**

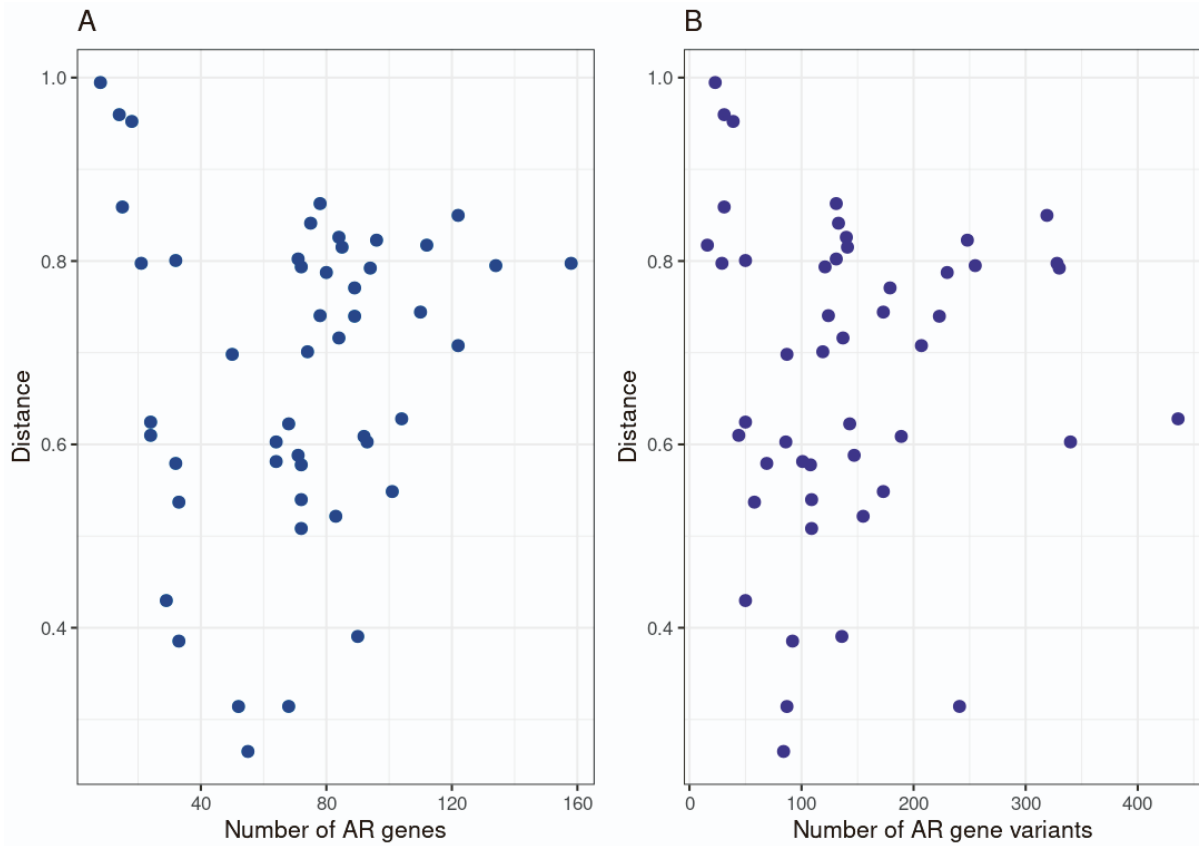

**Figure S11.** Scatter plots representing Bray-Curtis distances of the fecal samples taken in different time points for the same patient as a function of (A) the initial number of AR genes in the sample (B) the initial number of AR gene variants in the sample. **Related to Figure 3**

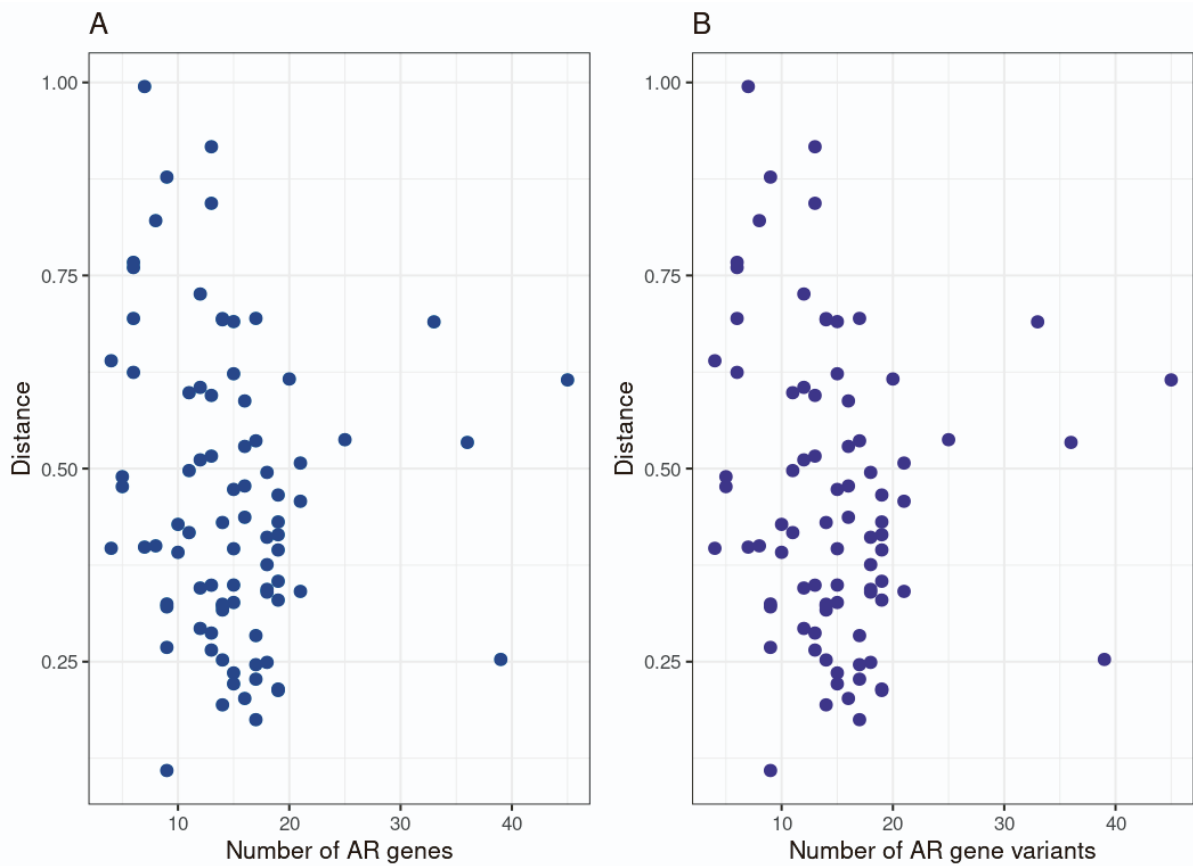

**Figure S12.** Scatter plots representing Bray-Curtis distances of the oropharyngeal samples taken in different time points for the same patient as a function of (A) the initial number of AR genes in the sample (B) the initial number of AR gene variants in the sample. **Related to Figure 3**

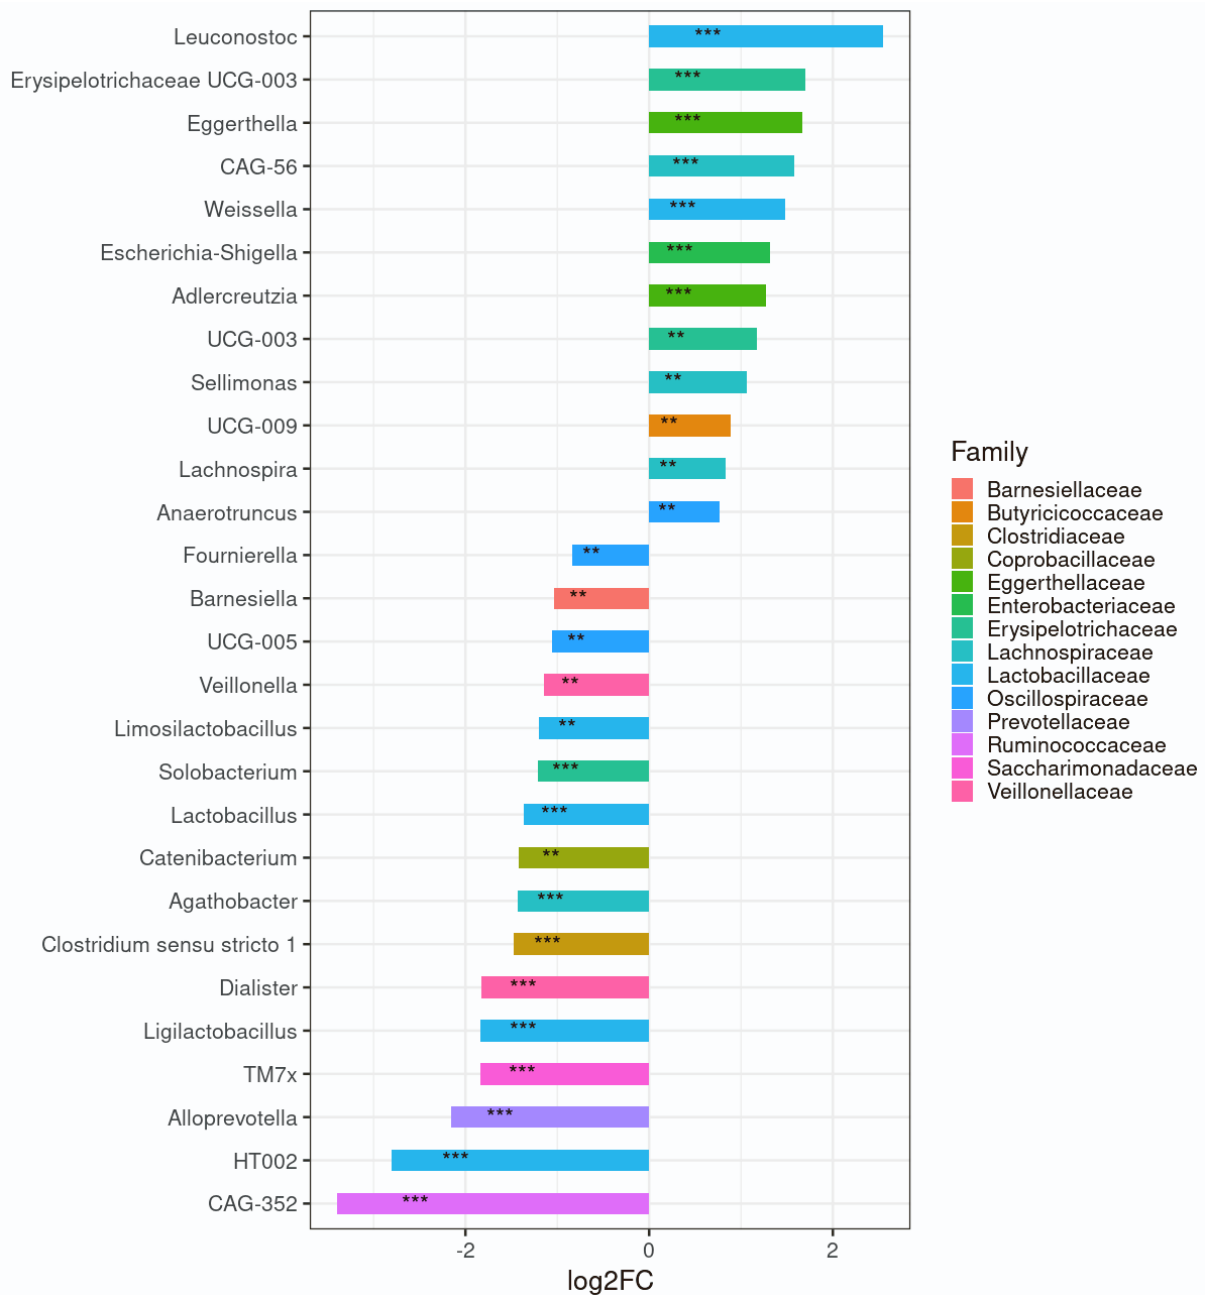

**Figure S13.** Barplots illustrating log<sub>2</sub> fold change of genus counts between resistotypes 1 and 2 calculated during DESeq2 analysis. Bars oriented right (positive log<sub>2</sub>FC) correspond to genera overrepresented in RT2, bars oriented left (negative log<sub>2</sub>FC) correspond to genera overrepresented in RT1. Genera with p-values < 0.05 are marked with “\*\*\*”, and genera with p-values < 0.01 are marked with “\*\*\*\*”. For details, see Supplementary Table S18. **Related to Figure 20**

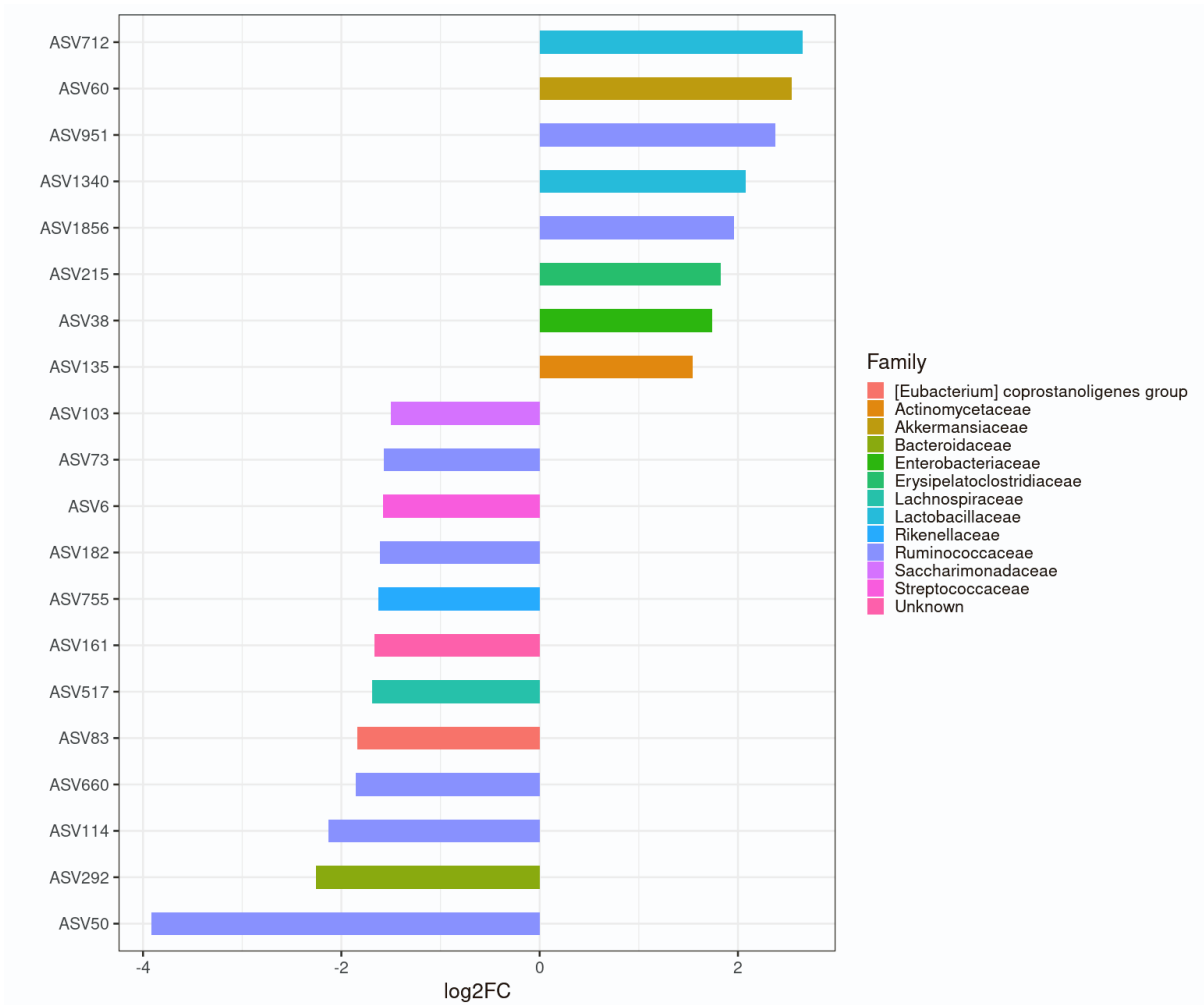

**Figure S14.** Barplots illustrating log<sub>2</sub> fold change of ASV counts between resistotypes 1 and 2 calculated during DESeq2 analysis. Bars oriented right (positive log<sub>2</sub>FC) correspond to ASVs overrepresented in RT2, bars oriented left (negative log<sub>2</sub>FC) correspond to ASVs overrepresented in RT1. On this figure, only ASVs with log<sub>2</sub> fold change values of more than 1.5 or less than -1.5 are displayed. For the full set of ASVs see Supplementary Table S20. **Related to Figure 20**

**Table S2.** The numbers of nucleotide sequences in targeted AMR gene sequencing panel presented by antibiotic group. **Related to STAR Methods**

| <b>Antibiotic group</b>                             | <b>Number of nucleotide sequences</b> |
|-----------------------------------------------------|---------------------------------------|
| Beta-lactams                                        | 3603                                  |
| MLS (macrolides, lincosamides, and streptogramines) | 250                                   |
| Quinolone                                           | 186                                   |
| Phenicol                                            | 105                                   |
| Trimethoprim                                        | 100                                   |
| Sulfonamides                                        | 64                                    |
| Phosphomycin                                        | 52                                    |
| Metronidazole                                       | 17                                    |
| Rifampin                                            | 17                                    |
| Nucleosides                                         | 15                                    |
| Antimicrobial peptides                              | 11                                    |
| Fusidic acid                                        | 8                                     |
| Bacitracin                                          | 6                                     |
| Mupirocin                                           | 4                                     |
| Aminocoumarins                                      | 2                                     |
| Thiopeptides                                        | 2                                     |
| Elfamycin                                           | 1                                     |
| Lipopeptides                                        | 1                                     |
| Tetracenomycin                                      | 1                                     |
| Tetracycline                                        | 1                                     |
| Multiple (multi-drug resistance)                    | 491                                   |

**Table S3.** The numbers of nucleotide sequences in targeted AMR gene sequencing panel presented by antibiotic group and resistance mechanism. **Related to STAR Methods**

| <b>AR determinant classification (resistance mechanism), according to MEGARes 2.0 database</b> | <b>Number of sequences</b> | <b>AB type</b>                  |
|------------------------------------------------------------------------------------------------|----------------------------|---------------------------------|
| Aminocoumarin-resistant DNA topoisomerases                                                     | 1                          | Aminocoumarins                  |
| Aminocoumarin efflux pump                                                                      | 1                          | Aminocoumarins                  |
| Bacitracin ABC transporter                                                                     | 3                          | Bacitracin                      |
| Chloramphenicol acetyltransferase                                                              | 47                         | Phenicol                        |
| Chloramphenicol hydrolase                                                                      | 2                          | Phenicol                        |
| Chloramphenicol phosphotransferase                                                             | 4                          | Phenicol                        |
| Class A beta-lactamases                                                                        | 1284                       | Beta-lactams                    |
| Class B beta-lactamases                                                                        | 410                        | Beta-lactams                    |
| Class C beta-lactamases                                                                        | 950                        | Beta-lactams                    |
| Class D beta-lactamases                                                                        | 900                        | Beta-lactams                    |
| Defensin-resistant <i>mprF</i>                                                                 | 4                          | Cationic antimicrobial peptides |
| Dihydrofolate reductase                                                                        | 100                        | Trimethoprim                    |
| Drug and biocide ABC efflux pumps                                                              | 3                          | <i>Non-specific resistance</i>  |
| Drug and biocide ABC efflux regulator                                                          | 1                          | <i>Non-specific resistance</i>  |
| Drug and biocide MATE efflux pumps                                                             | 17                         | <i>Non-specific resistance</i>  |
| Drug and biocide MATE efflux regulator                                                         | 1                          | <i>Non-specific resistance</i>  |
| Drug and biocide MFS efflux pumps                                                              | 59                         | <i>Non-specific resistance</i>  |
| Drug and biocide MFS efflux regulator                                                          | 10                         | <i>Non-specific resistance</i>  |
| Drug and biocide RND efflux pumps                                                              | 169                        | <i>Non-specific resistance</i>  |
| Drug and biocide RND efflux regulator                                                          | 36                         | <i>Non-specific resistance</i>  |
| Drug and biocide SMR efflux pumps                                                              | 52                         | <i>Non-specific resistance</i>  |
| Drug and biocide SMR efflux regulator                                                          | 1                          | <i>Non-specific resistance</i>  |
| Drug and biocide and metal MFS efflux pumps                                                    | 3                          | <i>Non-specific resistance</i>  |
| Drug and biocide and metal RND efflux pumps                                                    | 25                         | <i>Non-specific resistance</i>  |
| Drug and biocide and metal RND efflux regulator                                                | 7                          | <i>Non-specific resistance</i>  |
| Drug and biocide and metal resistance regulator                                                | 2                          | <i>Non-specific resistance</i>  |
| Drug and biocide and metal resistance regulator                                                | 1                          | <i>Non-specific resistance</i>  |
| Drug and metal MFS efflux pumps                                                                | 4                          | <i>Non-specific resistance</i>  |
| Edeine acetyltransferase                                                                       | 1                          | Cationic antimicrobial peptides |
| Elfamycin efflux pumps                                                                         | 1                          | Elfamycins                      |
| Flavin reductase                                                                               | 1                          | Sulfonamides                    |
| Fluoroquinolone ABC efflux pump                                                                | 2                          | Fluoroquinolones                |
| Fluoroquinolone resistance phosphotransferase                                                  | 1                          | Fluoroquinolones                |



|                                                 |     |                                 |
|-------------------------------------------------|-----|---------------------------------|
| Fosfomycin MFS efflux pump                      | 2   | Fosfomycin                      |
| Fosfomycin phosphorylation                      | 3   | Fosfomycin                      |
| Fosfomycin thiol transferases                   | 47  | Fosfomycin                      |
| Fusidic acid esterases                          | 3   | Fusidic acid                    |
| Lincosamide nucleotidyltransferases             | 23  | MLS                             |
| Lipid A modification                            | 4   | Cationic antimicrobial peptides |
| Lipid A phosphatase                             | 1   | Lipopeptides                    |
| MDR 23s ribosomal RNA methyltransferase         | 10  | <i>Non-specific resistance</i>  |
| MDR acetyltransferase                           | 1   | <i>Non-specific resistance</i>  |
| MDR regulator                                   | 7   | <i>Non-specific resistance</i>  |
| MLS resistance ABC efflux pumps                 | 19  | MLS                             |
| MLS resistance MFS efflux pumps                 | 26  | MLS                             |
| Macrolide esterases                             | 15  | MLS                             |
| Macrolide glycosyltransferases                  | 5   | MLS                             |
| Macrolide phosphotransferases                   | 27  | MLS                             |
| Monoxygenase                                    | 1   | Rifampin                        |
| Multi-drug ABC efflux pumps                     | 54  | <i>Non-specific resistance</i>  |
| Multi-drug MATE efflux pumps                    | 2   | <i>Non-specific resistance</i>  |
| Multi-drug MFS efflux pumps                     | 8   | <i>Non-specific resistance</i>  |
| Multi-drug RND efflux pumps                     | 13  | <i>Non-specific resistance</i>  |
| Multi-drug RND efflux regulator                 | 4   | <i>Non-specific resistance</i>  |
| Multi-drug SMR efflux regulator                 | 1   | <i>Non-specific resistance</i>  |
| Mupirocin-resistant isoleucyl-tRNA synthetase   | 4   | Mupirocin                       |
| Mutant porin proteins                           | 4   | Beta-lactams                    |
| Nim nitroimidazole reductase                    | 17  | Metronidazole                   |
| Penicillin binding protein                      | 43  | Beta-lactams                    |
| Penicillin binding protein regulator            | 12  | Beta-lactams                    |
| Phenicol resistance MFS efflux pumps            | 52  | Phenicol                        |
| Polymyxin B resistance regulator                | 2   | Cationic antimicrobial peptides |
| Quinolone active efflux                         | 10  | Fluoroquinolones                |
| Quinolone resistance protein <i>Qnr</i>         | 173 | Fluoroquinolones                |
| Ribosomal zinc-binding protein                  | 5   | Fusidic acid                    |
| Rifampin ADP-ribosyltransferase Arr             | 16  | Rifampin                        |
| Streptogramin A O-acetyltransferase             | 15  | MLS                             |
| Streptogramin B ester bond cleavage             | 4   | MLS                             |
| Sulfonamide-resistant dihydropteroate synthases | 62  | Sulfonamides                    |
| Sulfonamide monooxygenase                       | 1   | Sulfonamides                    |

|                                          |   |                |
|------------------------------------------|---|----------------|
| Tetracenomycin MFS efflux pump           | 1 | Tetracenomycin |
| Tetracycline resistance MFS efflux pumps | 1 | Tetracyclines  |
| Thiostrepton 23s rRNA methyltransferases | 2 | Thiopeptides   |
| Tunicamycin resistance protein           | 1 | Nucleosides    |
| Undecaprenyl pyrophosphate phosphatase   | 3 | Bacitracin     |

**Table S4.** Summary statistics of probe coverage. **Related to STAR Methods**

|                                                                 |         |
|-----------------------------------------------------------------|---------|
| Number of target regions                                        | 4937    |
| Target regions total length in base pairs                       | 4803602 |
| Expected number of base pairs covered with probes               | 4803581 |
| Number of base pairs covered with probes                        | 4793548 |
| % of target base pairs covered with probes                      | 99.79   |
| Number of target sequences not covered with probes              | 0       |
| Number of target base pairs not covered with probes             | 10054   |
| Number of target base pairs not covered due to sequence repeats | 305     |
| % of target base pairs not covered with probes                  | 0.21    |
| % of target base pairs not covered due to sequence repeats      | 0.01    |
| Number of probes in total                                       | 5277    |

**Table S5.** Most common sequence variants of “core” AR genes identified in fecal samples. **Related to Table 3**

| Gene | Sequence variant | % samples | Sequence variant carriers from nt database*                                                                                                                                                                                           | Of those, identified in fecal samples**                                                                                |
|------|------------------|-----------|---------------------------------------------------------------------------------------------------------------------------------------------------------------------------------------------------------------------------------------|------------------------------------------------------------------------------------------------------------------------|
| ERMB | 2801             | 91        | <i>Streptococcus</i>                                                                                                                                                                                                                  | <i>Streptococcus</i>                                                                                                   |
| CATA | 1576             | 89        | <i>Aeromonas salmonicida</i>                                                                                                                                                                                                          | none                                                                                                                   |
| LNUC | 3610             | 87        | <i>Streptococcus</i>                                                                                                                                                                                                                  | <i>Streptococcus</i>                                                                                                   |
| ERMF | 2829             | 87        | <i>Bacteroides, Riemerella, Prevotella</i>                                                                                                                                                                                            | <i>Bacteroides, Prevotella</i>                                                                                         |
| MSRD | 4073             | 85        | <i>Streptococcus, Gardnerella, Haemophilus, Neisseria</i>                                                                                                                                                                             | <i>Streptococcus, Haemophilus</i>                                                                                      |
| ERMB | 2799             | 84        | <i>Enterococcus</i>                                                                                                                                                                                                                   | <i>Enterococcus</i>                                                                                                    |
| ERMF | 2833             | 84        | <i>Parabacteroides, Bacteroides, Riemerella, Paraprevotella, Myroides, Sphingobacterium, Elizabethkingia, Alistipes, Phocaeicola</i>                                                                                                  | <i>Parabacteroides, Bacteroides, Paraprevotella, Alistipes, Phocaeicola</i>                                            |
| ERMB | 2794             | 84        | <i>Streptococcus, Enterococcus, Staphylococcus, Lactococcus, Bacillus, Clostridium, Macrooccus, Vagococcus, Anaerostipes, Ligilactobacillus, Mammaliicoccus, Campylobacter, Acinetobacter, Aliarcobacter, Vescimonas, Eggerthella</i> | <i>Streptococcus, Enterococcus, Lactococcus, Bacillus, Anaerostipes, Ligilactobacillus, Campylobacter, Eggerthella</i> |
| ERMB | 2806             | 82        | <i>Lactobacillus</i>                                                                                                                                                                                                                  | <i>Lactobacillus</i>                                                                                                   |

Sequence variants are provided according to the MEGARes 2.0 database structure. Only AR gene sequence variants that are present in more than 80% of samples are listed.

\* — bacterial genera corresponding to sequences from nt database with 100% sequence hits to query AR gene sequence variant. Note that this column does not indicate the presence of the corresponding genera in fecal samples

\*\* — genera identified in at least 3 fecal samples based on 16S rRNA amplicon sequencing data

**Table S6.** Most common sequence variants of “core” AR genes identified in oropharyngeal samples.  
**Related to Table 3**

| Gene | Sequence variant | % samples | Sequence variant carriers from nt database*                                              | Of those, identified in oropharyngeal samples ** |
|------|------------------|-----------|------------------------------------------------------------------------------------------|--------------------------------------------------|
| MSRD | 4073             | 99        | <i>Streptococcus, Gardnerella, Haemophilus, Neisseria</i>                                | <i>Streptococcus, Haemophilus, Neisseria</i>     |
| MEFA | 3805             | 99        | <i>Fusobacterium</i>                                                                     | <i>Fusobacterium</i>                             |
| MEFA | 3825             | 98        | <i>Streptococcus, Haemophilus, Gardnerella, Gemella, Enterococcus</i>                    | <i>Streptococcus, Haemophilus, Gemella</i>       |
| CFX  | 1698             | 97        | <i>Bacteroides, Parabacteroides, Prevotella, Capnocytophaga, Phocaeicola, Hoylesella</i> | <i>Bacteroides, Prevotella, Capnocytophaga</i>   |
| CFX  | 1692             | 94        | <i>Capnocytophaga, Bacteroides, Parabacteroides, Phocaeicola</i>                         | <i>Capnocytophaga, Bacteroides, Phocaeicola</i>  |
| CFX  | 1694             | 93        | <i>Parabacteroides, Bacteroides</i>                                                      | <i>Bacteroides</i>                               |
| CFX  | 1689             | 93        | <i>Prevotella</i>                                                                        | <i>Prevotella</i>                                |
| CFX  | 1693             | 93        | <i>Bacteroides, Prevotella</i>                                                           | <i>Bacteroides, Prevotella</i>                   |
| CFX  | 1697             | 91        | <i>Prevotella</i>                                                                        | <i>Prevotella</i>                                |
| CFX  | 1687             | 91        | <i>Prevotella</i>                                                                        | <i>Prevotella</i>                                |
| CFX  | 1690             | 91        | <i>Prevotella</i>                                                                        | <i>Prevotella</i>                                |
| LSAC | 3647             | 89        | <i>Streptococcus</i>                                                                     | <i>Streptococcus</i>                             |
| PATA | 5397             | 81        | <i>Streptococcus</i>                                                                     | <i>Streptococcus</i>                             |

Variants are provided according to the MegaRES database structure. Only AR gene sequence variants that are present in more than 80% of samples are listed.

\* — bacterial genera corresponding to sequences from nt database with 100% sequence hits to query AR gene sequence variant. Note that this column does not indicate the presence of the corresponding genera in oropharyngeal samples

\*\* — genera identified in oropharyngeal samples based on 16S rRNA amplicon sequencing data

**Table S7.** The counts of common “core” gene variants present in fecal and oropharyngeal samples that were considered “biotope-specific” (adjusted p-values for Chi-square test < 0.01). **Related to Table 3**

| Gene | Sequence variant | ORO smp, % | FEC smp, % | Sequence variant carriers from nt database                                                                                                                                                                                           | Of those, identified in fecal/oropharyngeal samples **                                                      |
|------|------------------|------------|------------|--------------------------------------------------------------------------------------------------------------------------------------------------------------------------------------------------------------------------------------|-------------------------------------------------------------------------------------------------------------|
| ERMB | 2792             | 49         | 77         | <i>Lactobacillus</i>                                                                                                                                                                                                                 | <i>Lactobacillus</i>                                                                                        |
|      | 2793             | 39         | 69         | <i>Streptococcus, Enterococcus, Jeotgalibaca, Eubacterium, Clostridiodes, Lactobacillus, Vescimonas, Oscillibacter, Gallibacterium, Faecalibacterium</i>                                                                             | <i>Streptococcus, Enterococcus, Eubacterium, Lactobacillus, Oscillibacter, Faecalibacterium</i>             |
|      | 2794             | 38         | 84         | <i>Enterococcus, Bacillus, Streptococcus, Staphylococcus, Clostridium, Macrococcus, Vagococcus, Butyricimonas, Ligilactobacillus, Acinetobacter, Aliarcobacter, Bacteroides, Lactococcus, Vescimonas, Mammalicoccus, Eggerthella</i> | <i>Enterococcus, Streptococcus, Butyricimonas, Ligilactobacillus, Bacteroides, Lactococcus, Eggerthella</i> |
|      | 2795             | 34         | 68         | <i>Escherichia</i>                                                                                                                                                                                                                   | none                                                                                                        |
|      | 2799             | 37         | 84         | <i>Enterococcus</i>                                                                                                                                                                                                                  | <i>Enterococcus</i>                                                                                         |
|      | 2803             | 46         | 78         | <i>Fusobacterium, Streptococcus, Enterococcus, Lactobacillus, Gallibacterium, Jeotgalibaca, Vescimonas</i>                                                                                                                           | <i>Fusobacterium, Streptococcus, Enterococcus, Lactobacillus</i>                                            |
|      | 2804             | 49         | 77         | <i>Staphylococcus, Clostridium, Enterococcus, Streptococcus, Blautia, Eubacterium</i>                                                                                                                                                | <i>Enterococcus, Streptococcus, Blautia</i>                                                                 |
|      | 2807             | 27         | 67         | <i>Bacillus, Escherichia, Streptococcus</i>                                                                                                                                                                                          | <i>Streptococcus</i>                                                                                        |
| MEFA | 3807             | 77         | 28         | <i>Streptococcus</i>                                                                                                                                                                                                                 | <i>Streptococcus</i>                                                                                        |
|      | 3818             | 51         | 25         | <i>Streptococcus</i>                                                                                                                                                                                                                 | <i>Streptococcus</i>                                                                                        |
|      | 3817             | 0          | 54         | <i>Clostridium</i>                                                                                                                                                                                                                   | none                                                                                                        |

\* — bacterial genera corresponding to sequences from nt database with 100% sequence hits to query AR gene sequence variant. Note that this column does not indicate the presence of the corresponding genera in oropharyngeal samples

\*\* — genera identified in oropharyngeal samples based on 16S rRNA amplicon sequencing data

**Table S10.** DeSeq2 results of comparing AR gene abundances of samples belonging to RT1 and RT2. **Related to Figure 11**

| Gene       | baseMean     | log2FoldChange | Adjusted p-value          |
|------------|--------------|----------------|---------------------------|
| QNRS       | 1032.284025  | -5.662881      | 0.00000005110334895668629 |
| IMP        | 505.401968   | -5.340015      | 0.00000000992390592306639 |
| SULI       | 46351.022561 | -5.140814      | 0.00000000000000004762656 |
| GES        | 7687.007181  | -5.096528      | 0.00000000000952794960975 |
| DFRA       | 2570.818035  | -4.774772      | 0.00000000078000896610104 |
| QACEDELTA1 | 1822.953684  | -4.429121      | 0.00000045231487689131303 |
| QEPA       | 123.094880   | -4.233436      | 0.00032582960850332224776 |
| NDM        | 157.340340   | -3.962034      | 0.00201366580632589319347 |
| CMY        | 1648.648091  | -3.803341      | 0.00022409600449038811348 |
| MPHA       | 3045.712144  | -3.696569      | 0.00000953728930451160313 |
| QACE       | 236.680255   | -3.546283      | 0.00022409600449038811348 |
| KPNE       | 154.836065   | -3.193324      | 0.01063283703975089963811 |
| OXA        | 2473.568838  | -2.986587      | 0.00000004585965129852267 |
| OMP37      | 548.753650   | -2.913998      | 0.01241390379986394808254 |
| CTX        | 73206.053635 | -2.817361      | 0.00003286169126135813436 |
| KPNF       | 178.663346   | -2.812481      | 0.02670448818736350510283 |
| PHOR       | 1534.084147  | -2.756576      | 0.01073239726008940603252 |
| KPNO       | 1449.593011  | -2.492181      | 0.00107445353188527123987 |
| SME        | 18.089999    | -2.401189      | 0.00084418414253166376530 |
| KMRA       | 2391.099884  | -2.395842      | 0.01713849539010021266749 |
| KDEA       | 1731.653965  | -2.350539      | 0.01948959366972261020301 |
| OQXB       | 12012.218608 | -2.298918      | 0.01599295275170065783188 |
| OQXA       | 3059.740328  | -2.275407      | 0.02781347988969037898777 |
| AXY        | 7.392696     | -2.143087      | 0.02745919680961389844343 |
| CARB       | 563.194085   | -2.089127      | 0.02038325875900827421905 |
| SULII      | 47960.457117 | -1.730265      | 0.01241390379986394808254 |
| QACAB      | 2.221045     | -1.592889      | 0.04848035359788580023199 |
| LMRD       | 369.119874   | -1.503795      | 0.00441329296342777947781 |
| LSAC       | 11.406770    | 1.249330       | 0.04696156987495617163297 |

|      |             |          |                           |
|------|-------------|----------|---------------------------|
| GADX | 1491.523128 | 1.539856 | 0.04954186648154208089112 |
| MDTJ | 554.433619  | 1.833449 | 0.02038325875900827421905 |
| MVRC | 129.315233  | 3.055406 | 0.00014537872116387605577 |

Positive log2FoldChange values indicate taxa overrepresented in RT2, negative log2FoldChange values indicate taxa overrepresented in RT1, baseMean indicates expected mean.

**Table S11.** The results of the Wilcoxon signed rank test with continuity correction for AR genes that have shown significant changes in abundance between "Day0" and "Day7" time points for both RPKM and TPM metrics. **Related to Figure 12**

| No. | gene | statistic | meandiff (RPKM)   | P-value              | Adjusted p-value     |
|-----|------|-----------|-------------------|----------------------|----------------------|
| 1   | ACI  | 190       | 609.624104225719  | 0.000143020073393161 | 0.044479242825273    |
| 2   | AXY  | 4         | -27.3855262868629 | 8.15918593056597e-07 | 0.000253750682440602 |
| 3   | CEOB | 8         | -39.6217409336698 | 2.03716165918574e-08 | 6.33557276006764e-06 |
| 4   | CMX  | 1069      | 818.605399726326  | 3.17463875323265e-05 | 0.00987312652255356  |
| 5   | EMRA | 1095      | 2485.4776197159   | 5.24011361196257e-05 | 0.0162967533332036   |
| 6   | EMRD | 1087      | 6842.14705310145  | 1.46209952156891e-05 | 0.00454712951207932  |
| 7   | MDTC | 1033      | 2409.77743796569  | 0.000137265065605683 | 0.0426894354033674   |
| 8   | MEXD | 494       | 53.4130758738025  | 0.000141319380515872 | 0.0439503273404361   |
| 9   | MEXI | 558       | 92.2041346588925  | 7.12890278696416e-05 | 0.0221708876674585   |
| 10  | MEXK | 580       | 48.9534852303327  | 0.000107655407151339 | 0.0334808316240664   |
| 11  | MEXQ | 665       | 287.823474049116  | 2.01097229885074e-05 | 0.00625412384942579  |
| 12  | MUXC | 525       | 48.1901218658302  | 0.000104066805626927 | 0.0323647765499743   |
| 13  | OXA  | 150       | -9343.73387923478 | 1.55603189752189e-06 | 0.000483925920129308 |
| 14  | PDC  | 475       | 173.620026301496  | 8.2807222250889e-05  | 0.0257530461200265   |

"Statistic" represents test statistic. "Meandiff" represents the difference of means between "Day7" and "Day0".

**Table S12.** Pairs of co-abundant oropharyngeal AR genes identified as a result of Spearman correlation tests based on RPKM values. **Related to Figure 13**

| No. | P-value       | Adjusted P-value | Rho       | Gene 1 | Gene 2 |
|-----|---------------|------------------|-----------|--------|--------|
| 1   | 1.363114e-151 | 5.410200e-148    | 0.9464875 | MACA   | MACB   |
| 2   | 2.811568e-118 | 1.115911e-114    | 0.9198716 | MACA   | NORMD  |
| 3   | 3.196456e-147 | 1.268673e-143    | 0.9397323 | MACB   | NORMD  |
| 4   | 9.081189e-200 | 3.604324e-196    | 0.9951210 | MEFA   | MSRD   |
| 5   | 7.394562e-41  | 2.934902e-37     | 0.9178604 | MTRD   | NORMD  |
| 6   | 7.766106e-174 | 3.082367e-170    | 0.9938914 | PATA   | PATB   |
| 7   | 5.501863e-125 | 2.183689e-121    | 0.9818547 | PATA   | PMRA   |
| 8   | 5.924928e-92  | 2.351604e-88     | 0.9390725 | PATA   | RLMA   |
| 9   | 1.819241e-117 | 7.220568e-114    | 0.9792267 | PATB   | PMRA   |
| 10  | 1.809914e-98  | 7.183550e-95     | 0.9383050 | PATB   | RLMA   |
| 11  | 1.150048e-77  | 4.564541e-74     | 0.9219260 | PMRA   | RLMA   |



**Table S15.** DeSeq2 results of comparing bacterial genera abundances of samples belonging to RT1 and RT2. **Related to Figure 20**

| Name                               | baseMean  | log2FoldChange | padj              |
|------------------------------------|-----------|----------------|-------------------|
| CAG-352                            | 360.63356 | -3.39796       | 0.00000000241495  |
| HT002                              | 22.40025  | -2.80717       | 0.00000000241495  |
| <i>Leuconostoc</i>                 | 33.98975  | 2.54808        | 0.00000001742023  |
| <i>Alloprevotella</i>              | 41.72780  | -2.15800       | 0.000021182481039 |
| TM7x                               | 20.01128  | -1.84116       | 0.000042550952728 |
| CAG-56                             | 63.07837  | 1.58128        | 0.000644640947426 |
| <i>Ligilactobacillus</i>           | 59.93694  | -1.83203       | 0.000685860315463 |
| <i>Eggerthella</i>                 | 317.06928 | 1.66491        | 0.000685860315463 |
| <i>Adlercreutzia</i>               | 9.30703   | 1.27568        | 0.001713459732047 |
| <i>Dialister</i>                   | 146.08062 | -1.82753       | 0.001761443924259 |
| Erysipelotrichaceae UCG-003        | 367.5682  | 1.695290       | 0.00315527        |
| <i>Weissella</i>                   | 26.3642   | 1.477956       | 0.00315527        |
| <i>Lactobacillus</i>               | 63.9491   | -1.368020      | 0.00359836        |
| <i>Agathobacter</i>                | 997.3529  | -1.434617      | 0.00581006        |
| <i>Solobacterium</i>               | 24.4382   | -1.209042      | 0.00652419        |
| <i>Clostridium sensu stricto 1</i> | 171.9043  | -1.479549      | 0.00652419        |
| <i>Escherichia-Shigella</i>        | 546.6498  | 1.314458       | 0.00882466        |
| <i>Lachnospira</i>                 | 297.6263  | 0.828715       | 0.01041431        |
| <i>Veillonella</i>                 | 102.0761  | -1.142334      | 0.01084205        |
| <i>Catenibacterium</i>             | 119.8207  | -1.421583      | 0.01084205        |
| UCG-005                            | 393.19025 | -1.058785      | 0.0220689         |
| UCG-003                            | 449.17866 | 1.177535       | 0.0289706         |
| UCG-009                            | 7.18051   | 0.883173       | 0.0327122         |
| <i>Limosilactobacillus</i>         | 118.73923 | -1.195831      | 0.0381906         |
| <i>Fournierella</i>                | 10.46153  | -0.839439      | 0.0381906         |
| <i>Anaerotruncus</i>               | 7.92645   | 0.770558       | 0.0404454         |
| <i>Sellimonas</i>                  | 37.41633  | 1.065948       | 0.0481650         |
| <i>Barnesiella</i>                 | 59.63515  | -1.032387      | 0.0481650         |

Positive log2FoldChange values indicate genera overrepresented in RT2, negative log2FoldChange values indicate genera overrepresented in RT1, baseMean indicates expected mean.

**Table S16.** DeSeq2 results of comparing bacterial species abundances of samples belonging to RT1 and RT2. **Related to Figure 20**

| Name                              | baseMean   | log2FoldChange | padj            |
|-----------------------------------|------------|----------------|-----------------|
| <i>Leuconostoc mesenteroides</i>  | 20.5213    | 1.98554        | 0.0000000331541 |
| <i>Blautia hansenii</i>           | 37.1569    | 1.88581        | 0.0000012021050 |
| <i>Alistipes shahii</i>           | 73.2806    | -1.62465       | 0.0000681913027 |
| <i>Alistipes finegoldii</i>       | 65.9726    | -1.55165       | 0.0001238045118 |
| <i>Bacteroides massiliensis</i>   | 142.6303   | 1.68859        | 0.0002313652998 |
| <i>Escherichia coli</i>           | 710.8258   | 1.39753        | 0.01318594386   |
| <i>Bacteroides ovatus</i>         | 168.9707   | -1.29609       | 0.01674711905   |
| <i>Streptococcus gallolyticus</i> | 14.0516    | 1.01783        | 0.01674711905   |
| <i>Lactobacillus gasseri</i>      | 48.8872    | -1.20795       | 0.02077969406   |
| <i>Streptococcus lutetiensis</i>  | 21.1477    | 1.09977        | 0.02077969406   |
| <i>Bacteroides clarus</i>         | 23.38705   | -1.218571      | 0.0207797       |
| <i>Mogibacterium pumilum</i>      | 5.14197    | 0.814291       | 0.0214077       |
| <i>Eggerthella lenta</i>          | 108.29444  | 1.207530       | 0.0237778       |
| <i>Ruminococcus callidus</i>      | 43.75722   | -1.133450      | 0.0303618       |
| <i>Dialister invisus</i>          | 134.81257  | -1.444327      | 0.0337717       |
| <i>Akkermansia muciniphila</i>    | 1148.39054 | -1.435285      | 0.0337717       |
| <i>Solobacterium moorei</i>       | 10.63597   | 0.826333       | 0.0378810       |

Positive log2FoldChange values indicate genera overrepresented in RT2, negative log2FoldChange values indicate genera overrepresented in RT1, baseMean indicates expected mean.
